# Supplementary material for: Tools and Databases of the KOMICS Web Portal for Preprocessing, Mining, and Dissemination of Metabolomics Data
Source: Biomed Res Int. 2014 Apr 9;2014:194812. doi: 10.1155/2014/194812 (PMC4052814; doi:10.1155/2014/194812)
Supplement: Supplementary file 2 [file 194812.f2.xlsx]

## Sheet: Table S1
TABLE S1: The standard compounds used for the comparison of accuracy of mass values obtained using PowerGet and Xcalibur.
Compound name	Chemical Formula	MassBase ID	KomicMarket				Mass value of [M+H]+ ion				Mass difference (ppm)
			Sample ID	Method ID	Analysis ID		Theoretical	Estimated by PowerGet	Estimated by Xcalibur		PowerGet	Xcalibur
(-)-Catechin Gallate	C22H18O10	MDLC1_04691	KSS1_SCN0001	KMS1_54	589		443.097	443.097	443.097		0.725008	0.864932
(-)-Epicatechin	C15H14O6	MDLC1_04736	KSS1_SCN0002	KMS1_58	593		291.086	291.086	291.086		0.231435	0.0527943
(-)-Epicatechin gallate	C22H18O10	MDLC1_04800	KSS1_SCS0155	KMS1_356	897		443.097	443.097	443.097		0.447417	0.436132
(-)-Epigallocatechin	C15H14O7	MDLC1_04766	KSS1_SCS0126	KMS1_316	857		307.081	307.081	307.081		0.4144	0.453478
(-)-Epigallocatechin Gallate	C22H18O11	MDLC1_04738	KSS1_SCN0004	KMS1_62	597		459.092	459.093	459.093		0.762654	0.941268
(-)-Gallocatechin	C15H14O7	MDLC1_06380	KSS1_SCS0269	KMS1_421	962		307.081	307.081	307.081		0.310193	0.583737
(-)-Gallocatechin gallate	C22H18O11	MDLC1_06381	KSS1_SCS0270	KMS1_423	964		459.092	459.092	459.092		0.239323	0.452788
(-)-Homoeriodictyol	C16H14O6	MDLC1_04757	KSS1_SCN0007	KMS1_68	603		303.086	303.086	303.086		0.4706	1.33504
(+)-Catechin	C15H14O6	MDLC1_04730	KSS1_SCN0008	KMS1_70	605		291.086	291.086	291.086		0.200517	0.0527943
(+/-)-Equol	C15H14O3	MDLC1_04740	KSS1_SCN0010	KMS1_73	609		243.102	243.102	243.102		0.556288	0.161392
2,3-Dimethoxy-2'-hydroxychalcone	C17H16O4	MDLC1_06443	KSS1_SCS0080	KMS1_280	820		285.112	285.112	285.112		0.27516	0.159416
2',4',6',3,4-Pentahydroxychalcone	C15H12O6	MDLC1_09013	KSS1_SCI0004	KMS1_1	483		289.071	289.071	289.071		0.634556	0.260945
2',6'-Dihydroxy-4,4'-dimethoxy-dihydrochalcone	C17H18O5	MDLC1_06407	KSS1_SCS0035	KMS1_228	764		303.123	303.123	303.123		0.264373	0.660253
2',6'-Dihydroxy-4'-methoxychalcone	C16H14O4	MDLC1_06408	KSS1_SCS0064	KMS1_262	802		271.096	271.096	271.096		0.31866	0.646957
2',6'-Dihydroxy-4-methoxychalcone-4'-O-neohesperidoside	C28H34O14	MDLC1_06386	KSS1_SCS0016	KMS1_191	727		595.202	595.202	595.202		0.69766	0.390201
2-Hydroxychalcone	C15H12O2	MDLC1_06444	KSS1_SCS0074	KMS1_275	815		225.091	225.091	225.091		0.226223	0.204714
3',4',5,5',6,7-Hexamethoxyflavone	C21H22O8	MDLC1_06387	KSS1_SCS0031	KMS1_222	758		403.139	403.139	403.138		0.0375357	1.39935
3',4',5',5,7-Pentamethoxyflavone	C20H20O7	MDLC1_06409	KSS1_SCS0063	KMS1_261	801		373.128	373.128	373.128		0.89901	1.49934
3,4',5-Trimethoxybenzophenone	C16H16O4	MDLC1_04723	KSS1_SCN0012	KMS1_74	610		273.112	273.112	273.112		0.587848	0.166421
3',4',7,8-Tetrahydroxyflavone	C15H10O6	MDLC1_06410	KSS1_SCS0071	KMS1_270	810		287.055	287.055	287.055		0.42328	0.712423
3',4',7,8-Tetramethoxyflavone	C19H18O6	MDLC1_09012	KSS1_SCS0038	KMS1_232	768		343.118	343.118	343.118		1.26557	0.977041
3',4',7-Trihydroxyisoflavone	C15H10O5	MDLC1_06388	KSS1_SCS0027	KMS1_211	747		271.06	271.06	271.06		0.243055	0.479165
3',4'-Dihydroxyflavone	C15H10O4	MDLC1_06369	KSS1_SCS0057	KMS1_252	792		255.065	255.065	255.065		0.702801	0.883147
3,4-Dimethoxychalcone	C17H16O3	MDLC1_06412	KSS1_SCS0054	KMS1_251	791		269.117	269.117	269.117		0.160416	0.337508
3',5,7-Trihydroxy-3,4'-dimethoxyflavone	C17H14O7	MDLC1_06428	KSS1_SCS0068	KMS1_268	808		331.081	331.081	331.081		0.413027	0.722646
3beta-(2-Diethylaminoethoxy)-Androstenone Hydrochloride	C25H41NO2	MDLC1_04697	KSS1_SCN0013	KMS1_75	611		388.321	388.321	388.321		0.654128	1.14856
4',6,7-Trimethoxyisoflavone	C18H16O5	MDLC1_09009	KSS1_SCS0013	KMS1_187	723		313.107	313.108	313.108		1.68928	1.66054
4',7-Dimethoxyisoflavone	C17H14O4	MDLC1_08159	KSS1_SCN0014	KMS1_76	612		283.096	283.097	283.097		2.28407	2.4183
4-Deoxyphloridzin	C21H24O9	MDLC1_06429	KSS1_SCS0053	KMS1_249	789		421.149	421.149	421.149		0.156282	0.472085
4'-Hydroxychalcone	C15H12O2	MDLC1_06445	KSS1_SCS0073	KMS1_274	814		225.091	225.091	225.091		0.102533	0.293567
4'-Hydroxyflavanone	C15H12O3	MDLC1_06370	KSS1_SCS0065	KMS1_264	804		241.086	241.086	241.086		0.581944	0.00291017
4'-Methoxyflavanone	C16H14O3	MDLC1_06360	KSS1_SCS0002	KMS1_169	705		253.086	253.086	253.086		0.658676	1.0696
5,6,7-Trihydroxyflavone	C15H10O5	MDLC1_06430	KSS1_SCS0049	KMS1_246	786		271.06	271.06	271.06		0.213541	0.700518
5,6-Benzoflavone	C19H12O2	MDLC1_06361	KSS1_SCS0009	KMS1_181	717		273.091	273.091	273.091		0.12421	0.681382
5,7,8-Trihydroxyflavone	C15H10O5	MDLC1_06431	KSS1_SCS0036	KMS1_230	766		271.06	271.06	271.06		0.16927	0.257811
5,7-Dihydroxy-3',4',5'-trimethoxyflavanone	C18H18O7	MDLC1_06389	KSS1_SCS0011	KMS1_183	719		347.113	347.112	347.112		0.470689	1.09297
5,7-Dihydroxy-3',4',5'-trimethoxyflavone	C18H16O7	MDLC1_08161	KSS1_SCS0138	KMS1_333	874		345.097	345.097	345.097		0.94374	0.291749
5,7-Dimethoxyflavanone	C17H16O4	MDLC1_06432	KSS1_SCS0052	KMS1_248	788		285.112	285.112	285.112		0.327771	0.580303
5-Deoxykaempferol	C15H10O5	MDLC1_06362	KSS1_SCS0025	KMS1_207	743		271.06	271.06	271.06		0.176649	0.589841
5-Hydroxyflavone	C15H10O3	MDLC1_06363	KSS1_SCS0008	KMS1_180	716		239.07	239.07	239.07		0.0768067	0.211811
6,7-Dihydroxyflavone	C15H10O4	MDLC1_04735	KSS1_SCN0015	KMS1_78	614		255.065	255.065	255.065		0.720364	0.373474
6-Methoxyluteolin	C16H12O7	MDLC1_06390	KSS1_SCS0003	KMS1_170	706		317.066	317.066	317.065		0.233992	0.754389
7,8-Dihydroxyflavone	C15H10O4	MDLC1_06371	KSS1_SCS0066	KMS1_265	805		255.065	255.065	255.065		0.153922	0.883147
7,8-Dimethoxyflavone	C17H14O4	MDLC1_06364	KSS1_SCS0021	KMS1_203	739		283.096	283.096	283.096		1.30128	0.937446
7-Hydroxy-5-methylflavone	C16H12O3	MDLC1_08429	KSS1_SCS0041	KMS1_235	771		253.086	253.086	253.086		1.12887	1.62278
Acacetin	C16H12O5	MDLC1_09003	KSS1_SCS0202	KMS1_388	929		285.076	285.076	285.076		1.30861	0.24536
Acacetin-7-rutinoside	C28H32O14	MDLC1_08160	KSS1_SCN0056	KMS1_147	683		593.186	593.188	593.192		2.80656	10.0437
Apigenin	C15H10O5	MDLC1_08155	KSS1_SCN0017	KMS1_81	617		271.06	271.06	271.06		1.25846	0.184895
Apigenin-7-O-glucoside	C21H20O10	MDLC1_04728	KSS1_SCN0018	KMS1_83	619		433.113	433.113	433.113		0.236227	0.307802
Apigenin-7-rutinoside	C27H30O14	MDLC1_08162	KSS1_SCS0116	KMS1_306	847		579.171	579.171	579.175		0.398637	7.17902
Asiatic acid	C30H48O5	MDLC1_06433	KSS1_SCS0060	KMS1_257	797		489.357	489.357	489.357		0.112586	0.370066
Bacitracin	C66H103N17O16S	MDLC1_11358	KSS1_SCSA0037	KMS1_431	972		1422.76	1422.75	1422.76		1.38451	1.46348
Baicalein 7-O-glucuronide	C21H18O11	MDLC1_04769	KSS1_SCS0134	KMS1_327	868		447.092	447.092	447.091		0.677425	1.56091
Baicalein-5,6,7-Trimethylether	C18H16O5	MDLC1_04729	KSS1_SCN0019	KMS1_85	621		313.107	313.107	313.107		0.526741	0.575119
Bavachinin A	C21H22O4	MDLC1_06341	KSS1_SCS0235	KMS1_396	937		339.159	339.159	339.159		1.02122	0.989633
Bergapten	C12H8O4	MDLC1_04709	KSS1_SCN0021	KMS1_86	622		217.05	217.05	217.05		0.247887	0.206422
Biliverdin dimethyl ester	C35H38N4O6	MDLC1_04715	KSS1_SCN0026	KMS1_87	623		611.286	611.287	611.288		1.4487	1.84623
Biochanin A	C16H12O5	MDLC1_06391	KSS1_SCS0015	KMS1_189	725		285.076	285.076	285.076		0.00369657	0.771536
Biochanin A-7-O-glucoside	C22H22O10	MDLC1_06328	KSS1_SCS0192	KMS1_372	913		447.129	447.129	447.128		0.202678	0.343026
Brassinolide	C28H48O6	MDLC1_06475	KSS1_SCS0081	KMS1_281	821		481.352	481.352	481.352		0.392056	0.344274
Butein	C15H12O5	MDLC1_04770	KSS1_SCS0133	KMS1_325	866		273.076	273.076	273.075		0.36234	1.35474
Cepharanthine	C37H38N2O6	MDLC1_04711	KSS1_SCN0029	KMS1_88	624		607.28	607.28	607.28		0.609953	0.384357
Chelidonine	C20H19NO5	MDLC1_04713	KSS1_SCN0031	KMS1_90	626		354.134	354.133	354.133		1.03118	1.26838
Chrysin	C15H10O4	MDLC1_08157	KSS1_SCN0033	KMS1_92	628		255.065	255.065	255.065		1.02225	0.255857
Chrysoeriol	C16H12O6	MDLC1_09005	KSS1_SCS0241	KMS1_406	947		301.071	301.071	301.071		0.964662	0.1509
Coproporphyrin III Dihydrochloride	C36H38N4O8	MDLC1_04717	KSS1_SCN0035	KMS1_94	630		655.276	655.276	655.276		0.902935	0.733541
Cucurbitacin I	C30H42O7	MDLC1_04774	KSS1_SCS0132	KMS1_323	864		515.3	515.3	515.3		0.0792784	0.0385255
Cupressuflavone trihydrate	C30H18O10	MDLC1_09006	KSS1_SCS0244	KMS1_411	952		539.097	539.098	539.097		1.50947	0.543963
Daidzein	C15H10O4	MDLC1_04733	KSS1_SCN0038	KMS1_98	634		255.065	255.065	255.065		1.04969	0.373474
Datiscoside	C27H30O15	MDLC1_06435	KSS1_SCS0039	KMS1_233	769		595.166	595.165	595.165		1.16563	1.08666
Demissidine	C27H45NO	MDLC1_04714	KSS1_SCN0041	KMS1_103	639		400.357	400.357	400.357		0.945448	0.75312
Didymin	C28H34O14	MDLC1_06352	KSS1_SCS0239	KMS1_403	944		595.202	595.203	595.204		0.933719	2.80199
Dihydrorobinetin	C15H12O7	MDLC1_06366	KSS1_SCS0006	KMS1_176	712		305.066	305.066	305.065		0.230084	0.489045
Diosmetin	C16H12O6	MDLC1_04775	KSS1_SCS0110	KMS1_298	839		301.071	301.071	301.07		0.151355	1.27734
Eriodictyol	C15H12O6	MDLC1_04742	KSS1_SCN0045	KMS1_112	648		289.071	289.071	289.07		0.672609	0.811457
Eriodictyol-7-O-glucoside	C21H22O11	MDLC1_04777	KSS1_SCS0108	KMS1_294	835		451.123	451.123	451.123		0.54752	0.438902
Eriodictyol-7-O-rutinoside	C27H32O15	MDLC1_04741	KSS1_SCN0044	KMS1_110	646		597.181	597.182	597.183		1.28134	1.9478
Fisetin	C15H10O6	MDLC1_06353	KSS1_SCS0245	KMS1_412	953		287.055	287.055	287.055		0.158523	0.921443
Flavanone	C15H12O2	MDLC1_06374	KSS1_SCS0089	KMS1_283	823		225.091	225.091	225.091		0.563864	0.461683
Formononetin	C16H12O4	MDLC1_04807	KSS1_SCS0156	KMS1_358	899		269.081	269.081	269.081		0.00251263	0.763057
Formononetin-7-O-glucoside	C22H22O9	MDLC1_04808	KSS1_SCS0151	KMS1_349	890		431.134	431.133	431.133		0.623367	0.553783
Fustin	C15H12O6	MDLC1_06392	KSS1_SCS0007	KMS1_178	714		289.071	289.071	289.07		0.223366	0.569302
Galangin	C15H10O5	MDLC1_04780	KSS1_SCS0112	KMS1_300	841		271.06	271.06	271.06		0.0733505	1.29079
Genistein	C15H10O5	MDLC1_06367	KSS1_SCS0018	KMS1_197	733		271.06	271.06	271.06		0.235676	0.700518
Gossypetin-8-O-glucoside	C21H20O13	MDLC1_06436	KSS1_SCS0059	KMS1_255	795		481.098	481.098	481.098		0.264353	0.172148
Hesperetin	C16H14O6	MDLC1_06329	KSS1_SCS0198	KMS1_382	923		303.086	303.086	303.086		0.443331	0.345223
Homobutein	C16H14O5	MDLC1_06330	KSS1_SCS0196	KMS1_378	919		287.091	287.092	287.091		0.386602	0.41802
Homoeriodictyol	C16H14O6	MDLC1_04756	KSS1_SCN0051	KMS1_135	671		303.086	303.086	303.086		0.338624	1.23606
Isoliquiritigenin	C15H12O4	MDLC1_06393	KSS1_SCS0019	KMS1_199	735		257.081	257.081	257.081		0.176302	0.68198
Isookanin-7-Glucoside	C21H22O11	MDLC1_04779	KSS1_SCS0127	KMS1_318	859		451.123	451.123	451.123		0.261567	0.0398982
Isorhamnetin	C16H12O7	MDLC1_08991	KSS1_SCS0157	KMS1_361	902		317.066	317.066	317.066		1.02127	0.186683
Isorhamnetin-3-glucoside	C22H22O12	MDLC1_04982	KSS1_SCS0017	KMS1_193	729		479.118	479.118	479.118		1.04279	1.06993
Isorhamnetin-3-O-rutinoside	C28H32O16	MDLC1_06395	KSS1_SCS0029	KMS1_215	751		625.176	625.176	625.175		0.750875	1.63383
Isosakuranetin	C16H14O5	MDLC1_06438	KSS1_SCS0045	KMS1_240	780		287.091	287.091	287.091		0.323973	0.627013
Isosakuranetin-7-Neohesperidoside	C28H34O14	MDLC1_06331	KSS1_SCS0204	KMS1_390	931		595.202	595.203	595.203		1.05301	0.853074
Isovitexin	C21H20O10	MDLC1_06354	KSS1_SCS0236	KMS1_397	938		433.113	433.113	433.112		0.834223	1.43915
Kaempferide	C16H12O6	MDLC1_06332	KSS1_SCS0191	KMS1_370	911		301.071	301.071	301.071		0.841767	0.148033
Kaempferol	C15H10O6	MDLC1_04758	KSS1_SCN0052	KMS1_137	673		287.055	287.055	287.055		0.364058	1.44399
Kaempferol-3,7,4'-trimethylether	C18H16O6	MDLC1_09010	KSS1_SCS0010	KMS1_182	718		329.102	329.103	329.103		2.25554	2.02157
Kaempferol-3-O-glucoside	C21H20O11	MDLC1_04759	KSS1_SCN0053	KMS1_139	675		449.108	449.108	449.107		0.567648	0.93059
Kaempferol-3-O-rutinoside	C27H30O15	MDLC1_04811	KSS1_SCS0145	KMS1_339	880		595.166	595.165	595.165		0.532194	0.565798
Liquiritigenin	C15H12O4	MDLC1_04812	KSS1_SCS0158	KMS1_362	903		257.081	257.081	257.081		0.0129294	0.565285
Liquiritigenin monohydrate	C15H12O4	MDLC1_04784	KSS1_SCS0118	KMS1_310	851		257.081	257.081	257.081		0.261878	0.798674
Luteolin 8-C-glucoside	C21H20O11	MDLC1_08988	KSS1_SCS0107	KMS1_293	834		449.108	449.108	449.108		0.385352	0.240332
Luteolin tetramethylether	C19H18O6	MDLC1_09011	KSS1_SCS0014	KMS1_188	724		343.118	343.118	343.117		1.42878	0.45104
Luteolin-3',7-di-O-glucoside	C27H30O16	MDLC1_08987	KSS1_SCS0140	KMS1_336	877		611.161	611.161	611.161		0.637532	0.963142
Luteolin-6-C-glucoside	C21H20O11	MDLC1_04761	KSS1_SCN0057	KMS1_149	685		449.108	449.108	449.107		0.376157	1.26459
Maritimetin-6-glucoside	C21H20O11	MDLC1_04788	KSS1_SCS0124	KMS1_314	855		449.108	449.108	449.108		0.594368	0.730193
Matairesinol	C20H22O6	MDLC1_04719	KSS1_SCN0058	KMS1_151	687		359.149	359.149	359.149		0.0309412	0.0414522
Morin Dihydrate	C15H10O7	MDLC1_06373	KSS1_SCS0077	KMS1_278	818		303.05	303.05	303.05		0.0325788	0.822066
Myricetin	C15H10O8	MDLC1_04762	KSS1_SCN0059	KMS1_153	689		319.045	319.045	319.044		0.438024	1.20281
Myricetin-3-O-rhamnoside	C21H20O12	MDLC1_04763	KSS1_SCN0060	KMS1_155	691		465.103	465.103	465.102		0.439811	0.994528
Naringenin	C15H12O5	MDLC1_04815	KSS1_SCS0160	KMS1_365	906		273.076	273.076	273.075		0.0221689	1.13502
Naringenin-7-O-glucoside	C21H22O10	MDLC1_06397	KSS1_SCS0026	KMS1_209	745		435.129	435.129	435.128		0.0698109	0.927029
Naringenin-7-O-neohesperidoside	C27H32O14	MDLC1_06356	KSS1_SCS0238	KMS1_401	942		581.186	581.186	581.187		0.0347305	0.288746
Naringenin-7-O-rutinoside	C27H32O14	MDLC1_06334	KSS1_SCS0201	KMS1_386	927		581.186	581.187	581.187		0.57781	0.288746
Neoeriocitrin	C27H32O15	MDLC1_06335	KSS1_SCS0197	KMS1_380	921		597.181	597.182	597.182		0.715348	1.22776
Neohesperidin	C28H34O15	MDLC1_04789	KSS1_SCS0121	KMS1_312	853		611.197	611.197	611.197		0.359738	0.240301
Neohesperidin dihydrochalcone	C28H36O15	MDLC1_06474	KSS1_SCS0044	KMS1_238	778		613.213	613.212	613.212		1.30124	0.679919
O-Acetylcolumbianetin	C16H16O5	MDLC1_06398	KSS1_SCS0022	KMS1_204	740		289.107	289.107	289.107		0.0931357	0.830398
Okanin-4'-Glucoside	C21H22O11	MDLC1_04790	KSS1_SCS0136	KMS1_329	870		451.123	451.123	451.123		0.678304	0.904406
Phloretin	C15H14O5	MDLC1_06400	KSS1_SCS0005	KMS1_174	710		275.091	275.091	275.091		0.294484	1.12693
Pratol	C16H12O4	MDLC1_09007	KSS1_SCS0234	KMS1_395	936		269.081	269.081	269.081		0.745784	0.205603
Procyanidin B1 from apple (Malus pumila)	C30H26O12	MDLC1_06383	KSS1_SCS0272	KMS1_425	966		579.15	579.149	579.149		0.451954	1.23068
Procyanidin C1	C45H38O18	MDLC1_06385	KSS1_SCS0276	KMS1_429	970		867.213	867.213	867.212		0.629448	1.0734
Quercetagetin	C15H10O8	MDLC1_06372	KSS1_SCS0034	KMS1_226	762		319.045	319.045	319.045		0.0666073	0.325187
Quercetin-3-arabinoglucoside	C26H28O16	MDLC1_06402	KSS1_SCS0020	KMS1_201	737		597.145	597.145	597.144		0.285194	1.10744
Quercetin-3-galactoside	C21H20O12	MDLC1_04819	KSS1_SCS0153	KMS1_353	894		465.103	465.103	465.102		0.177504	0.908525
Quercetin-3-O-beta-D-glucopyranosyl-6''-acetate	C23H22O13	MDLC1_06403	KSS1_SCS0012	KMS1_185	721		507.113	507.113	507.113		0.058678	0.921379
Quercetin-3-O-rhamnoside	C21H20O11	MDLC1_04792	KSS1_SCS0115	KMS1_304	845		449.108	449.108	449.107		0.462996	0.997389
Rhamnetin	C16H12O7	MDLC1_08989	KSS1_SCS0131	KMS1_322	863		317.066	317.066	317.065		1.31143	0.565154
Rhoifolin	C27H30O14	MDLC1_06337	KSS1_SCS0194	KMS1_376	917		579.171	579.171	579.171		0.612736	0.324393
Rifampicin	C43H58N4O12	MDLC1_11362	KSS1_SCSA0042	KMS1_432	973		823.412	823.413	823.415		0.567396	2.98781
Robinetin	C15H10O7	MDLC1_06357	KSS1_SCS0242	KMS1_407	948		303.05	303.05	303.05		0.0697146	0.723072
Robinin	C33H40O19	MDLC1_06441	KSS1_SCS0061	KMS1_259	799		741.224	741.223	741.223		0.796725	0.776488
Rutin	C27H30O16	MDLC1_04531	KSS1_SCI0044	KMS1_7	515		611.161	611.162	611.163		2.91844	3.07388
Sakuranetin monohydrate	C16H14O5	MDLC1_04793	KSS1_SCS0137	KMS1_331	872		287.091	287.091	287.091		0.654879	1.28882
Silybin	C25H22O10	MDLC1_06404	KSS1_SCS0004	KMS1_172	708		483.129	483.129	483.128		0.108412	0.317466
Syringetin	C17H14O8	MDLC1_06376	KSS1_SCS0233	KMS1_393	934		347.076	347.076	347.076		0.495214	0.875534
Syringetin-3-O-galactoside	C23H24O13	MDLC1_06338	KSS1_SCS0199	KMS1_384	925		509.129	509.129	509.129		0.814514	0.771303
Tamarixetin	C16H12O7	MDLC1_04796	KSS1_SCS0109	KMS1_296	837		317.066	317.066	317.065		0.183529	1.44825
Tiliroside	C30H26O13	MDLC1_06377	KSS1_SCS0237	KMS1_399	940		595.145	595.144	595.144		0.955014	0.449254
Verbenalin	C17H24O10	MDLC1_06405	KSS1_SCS0033	KMS1_224	760		389.144	389.144	389.144		0.51251	0.856856
Vitexin	C21H20O10	MDLC1_09008	KSS1_SCS0247	KMS1_416	957		433.113	433.113	433.113		0.99209	0.584866
Vitexin-2''-O-rhamnoside	C27H30O14	MDLC1_06442	KSS1_SCS0072	KMS1_272	812		579.171	579.17	579.17		0.868692	0.625241
											Mean ± SD *a
											0.579 ± 0.481	0.783 ± 0.563
*a Acacetin-7-rutinoside and Apigenin-7-rutinoside (bold face) were omitted from the calculation because of improper, large mass differences with Xcalibur.
