# Supplementary material for: Tools and Databases of the KOMICS Web Portal for Preprocessing, Mining, and Dissemination of Metabolomics Data
Source: Biomed Res Int. 2014 Apr 9;2014:194812. doi: 10.1155/2014/194812 (PMC4052814; doi:10.1155/2014/194812)
Supplement: Supplementary file 3 [file 194812.f3.xlsx]

## Sheet: Table S2
TABLE S2: The data used for peak alignment of GC-MS data through FragmentAlign.
Sample	MassBase ID
Arabidopsis leaf	MDGC1_01990
	MDGC1_01992
	MDGC1_01996
	MDGC1_01998
	MDGC1_02000
Lotus japonicus leaf	MDGC1_01980
	MDGC1_01982
	MDGC1_01984
	MDGC1_01986
	MDGC1_01988
Arabidopsis cltured cell	MDGC1_02742
	MDGC1_02744
	MDGC1_02746
	MDGC1_02748
	MDGC1_02750
