# Supplementary material for: Tools and Databases of the KOMICS Web Portal for Preprocessing, Mining, and Dissemination of Metabolomics Data
Source: Biomed Res Int. 2014 Apr 9;2014:194812. doi: 10.1155/2014/194812 (PMC4052814; doi:10.1155/2014/194812)
Supplement: Supplementary file 5 [file 194812.f5.xlsx]

## Sheet: Table S4
TABLE S4. Comparison of accuracy of peak area quantification in SpiceHit and in ChemStation.
Amino acid	Correlation coefficients between amino acid concentrations and peak area values *a			Correlation coefficients of peak area values estimated using SpiceHit and ChemStation *b
	PeakIdentifier	ChemStation
Glycine	0.99977	0.999779		0.999995
Alanine	0.999486	0.999578		0.99997
Serine	0.998316	0.998204		0.999998
Proline	0.996719	0.996355		0.999987
Valine	0.998966	0.998862		0.999996
Threonine	0.999179	0.998332		0.999802
Cysteine	0.974933	0.977055		0.999932
Isoleucine	0.997765	0.998244		0.999055
Leucine	0.999137	0.998369		0.999456
Asparagine	0.999163	0.999542		0.999936
Aspartic acid	0.999491	0.999542		0.999999
Lysine	0.992506	0.992581		1
Glutamic acid	0.998532	0.998373		0.999996
Methionine	0.999142	0.999177		1
Histidine	0.997833	0.997909		0.999999
Phenylalanine	0.998343	0.996982		0.999723
Arginine	0.997237	0.997366		0.999998
Tyrosine	0.997958	0.997871		0.999999
Tryptophan	0.997817	0.998052		0.999992
Cystine	0.999243	0.999245		0.999998
average	0.997077	0.997071		0.999891
maximum	0.99977	0.999779		1
minimum	0.974933	0.977055		0.999055
*aPearson's correlation coefficients calculated between the concentrations of amino acids and their peak area quantified using SpiceHit and ChemStation.
*bPearson's correlation coefficients of the peak areas measured using SpiceHit and ChemStation. Four solutions containing a mixture of amino acids at 10, 50, 100 and 1000 µM were analyzed in triplicate, and the averages of logarithm base 10-transformed peak areas were used for estimating the correlation coefficients.
